# Supplementary material
Source: Springer Nature journal article supplement (https://www.springermedizin.de/resource/supplementary/13002_2011_279_MOESM2_ESM.pdf/9627512)

China

Yunnan

0 125 250 500 Kilometers

N

## Naban River Watershed National Nature Reserve

- Villages
- rivers
- buffer zone
- core zone
- experimental zone

4

0 2.5 5 10 Kilometers

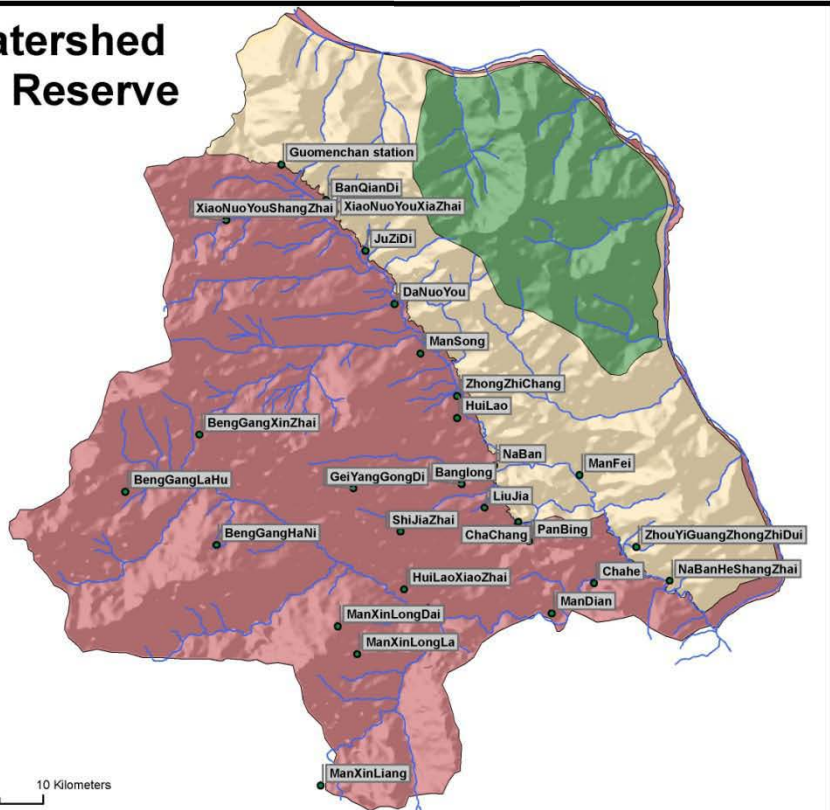

China

Yunnan

0 125 250 500 Kilometers

N

## Naban River Watershed National Nature Reserve

- Villages
- rivers
- buffer zone
- core zone
- experimental zone

4

0 2.5 5 10 Kilometers

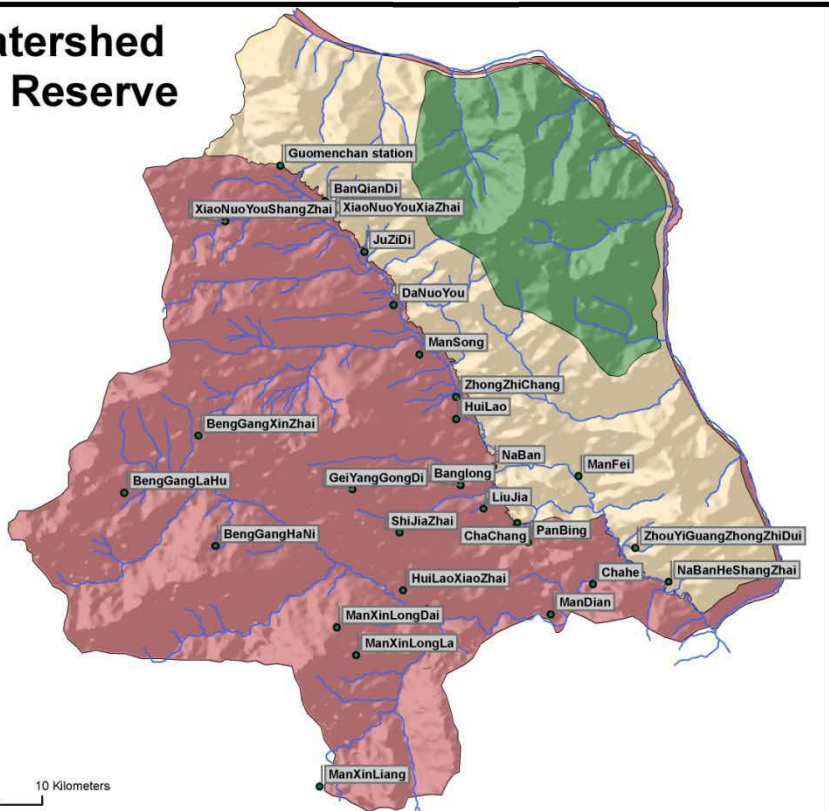

Supplement: MOESM2 [file 9627512]
